# Supplementary material for: Ultrasonic-template technology inducing and regulating cationic microblocks in CPAM: characterization, mechanism and sludge flocculation performance
Source: Royal Society of Chemistry journal article supplement (doi:10.1039/c7ra03784h), 2017-01-01
Supplement: c7ra03784h1.pdf [file c7ra03784h1.pdf]

## Cover Page for Supporting Information

**Manuscript title:** Ultrasonic-Template Technology Inducing and Regulating the Cationic Microblocks in CPAM: Characterization, Mechanism and Sludge Flocculation Performance.

Li Feng<sup>a,b,c</sup>, Huaili Zheng<sup>a,b,c\*</sup>, Yili Wang<sup>d</sup>, Shixin Zhang<sup>a,b,c</sup>, Bincheng Xu<sup>a,b,c</sup>

a. Key Laboratory of the Three Gorges Reservoir Region's Eco-Environment, Ministry of Education, Chongqing University, Chongqing 400045, China

b. National Centre for International Research of Low-carbon and Green Buildings, Chongqing University, Chongqing ijing Forestry University, Beijing 100083, China

\*Corresponding author. Tel.: +86 23 65120827. Fax: +86 23 65120827.

E-mail address: zhl6512@126.com (Huaili Zheng)

400045, China

c. Chongqing Engineering Research Center of Water TreatmCent Coagulant, Chongqing 400045, China

d. College of Environmental Science and Engineering, Research Center for Water Pollution Source Control and Eco-remediation, Beijing Forestry University, Beijing 100083, China

Total number of pages (including the cover page): 5 pages

This file contains 2 Texts and 1 Figure.

### Contents:

**Text S1.** Analytical methods for the association constant ( $K_M$ ) and the polymerization rate ( $R_p$ ).

**Text S2.** Analytical methods for FCMC and SRF.

**Fig. S1.** The proposed reaction route for TPAD and TPAD-U.

**Text S1.** Analytical methods for the association constant ( $K_M$ ) and the polymerization rate ( $R_p$ ).

The association constant ( $K_M$ ) and reaction kinetics were investigated as follows. The  $K_M$  (between DMC and PMAA) was measured by bag filter method. A predetermined dose of template PMAA with a molecular weight ( $M_w$ ) of 5100 was added into a dialysis bag (Intercepted,  $M_wCO$  3500, MD 25-3.5, USA), and then the dialysis bag was submerged in deionized water for dialysis. During the process of dialysis, the low  $M_w$  of PMAA was removed and the remaining PMAA became more similar and uniform. After 48 h dialysis, the PMAA in the dialysis bag was precipitated by ethanol and the precipitation and dried in a vacuum oven at 60 °C for 24 h. A certain dose of DMC and the precipitation PMAA were dissolved in deionized water in a 250 mL glass beaker, and then the solution pH was adjusted to 3.0 by 0.5 mol L<sup>-1</sup> HCl and NaOH. Subsequently, the glass beaker was sealed immediately and kept for 24 h at room temperature to arrive a penetration balance. Finally, the  $K_M$  was calculated by the following formula:

$$K_M = \frac{[PMAA \text{ **** } DMC]}{[PMAA]_f [DMC]_f}$$

(1)

Where  $[PMAA \text{ **** } DMC]$  was the concentration of the association of PMAA and DMC,  $[PMAA]_f$  and  $[DMC]_f$  were the free concentration when the dialysis kept balance.

Meanwhile, the free concentration of PMAA and DMC was measured by

conductometric titration method. Prior to the determination of polymerization rate ( $R_p$ ), the monomer conversion rate was controlled to less than 10% by shortening the sonication time at 35 °C, and the calculation equation of  $R_p$  was described as follows:

$$R_p = k \times [M] \quad (2)$$

Where  $[M]$  was the initial concentration of monomer, and  $k$  was the slope of the  $Y_t = \ln[1/(1-C_t)]$  plot (a fitting straight line), where  $C_t$  was the monomer conversion (C) with a given reaction time at 1 min, 3 min, 5 min, 7 min and 9 min, and it was determined by gravimetric method.<sup>1</sup>

**Text S2.** Analytical methods for FCMC and SRF.

After a 30 min settling period, the conditioned sludge was poured into a Buchner funnel for filtering under a vacuum pressure of 0.09 MPa for 30 min or until the vacuum could not be maintained (in <30 min). FCMC was obtained by the Equation 1:<sup>2</sup>

$$FCMC\% = \frac{M_1 - M_2}{M_1} \quad \text{Equation 1}$$

where FCMC is the filter cake moisture content,  $M_1$  is the weight of the wet filter cake after filtration, and  $M_2$  is the weight of filter cake after drying at 105 °C for 4 h.

SRF was calculated from the Equation 2:<sup>3</sup>

$$SRF = \frac{2bpA^2}{\mu c} \quad \text{Equation 2}$$

where SRF is the specific resistance to filtration,  $P$  is the filtration pressure (N/m<sup>2</sup>),  $A$  is the filtration area (m<sup>2</sup>),  $\mu$  is the viscosity of filtrate (N·s/ m<sup>2</sup>),  $b$  is the slope obtained from the plot of  $t/V_f(y) - V_f(x)$ , where  $V_f$  is the volume of filtrate (m<sup>3</sup>) and  $t$  is the filtration time (s), and filtrate volume was recorded at 5 s, 10 s, 20 s, 30 s, 40 s, 50 s, 60 s, 70 s and 80 s during the filtration, and  $c$  is the weight of solids per unit filtrate volume (kg/m<sup>3</sup>),  $c = [(1/C_i)/[(100C_i - C_f)/100C_f]]$ , where  $C_i$  is the initial moisture content (%) and  $C_f$  is the final moisture content (%).

**Fig. S1**

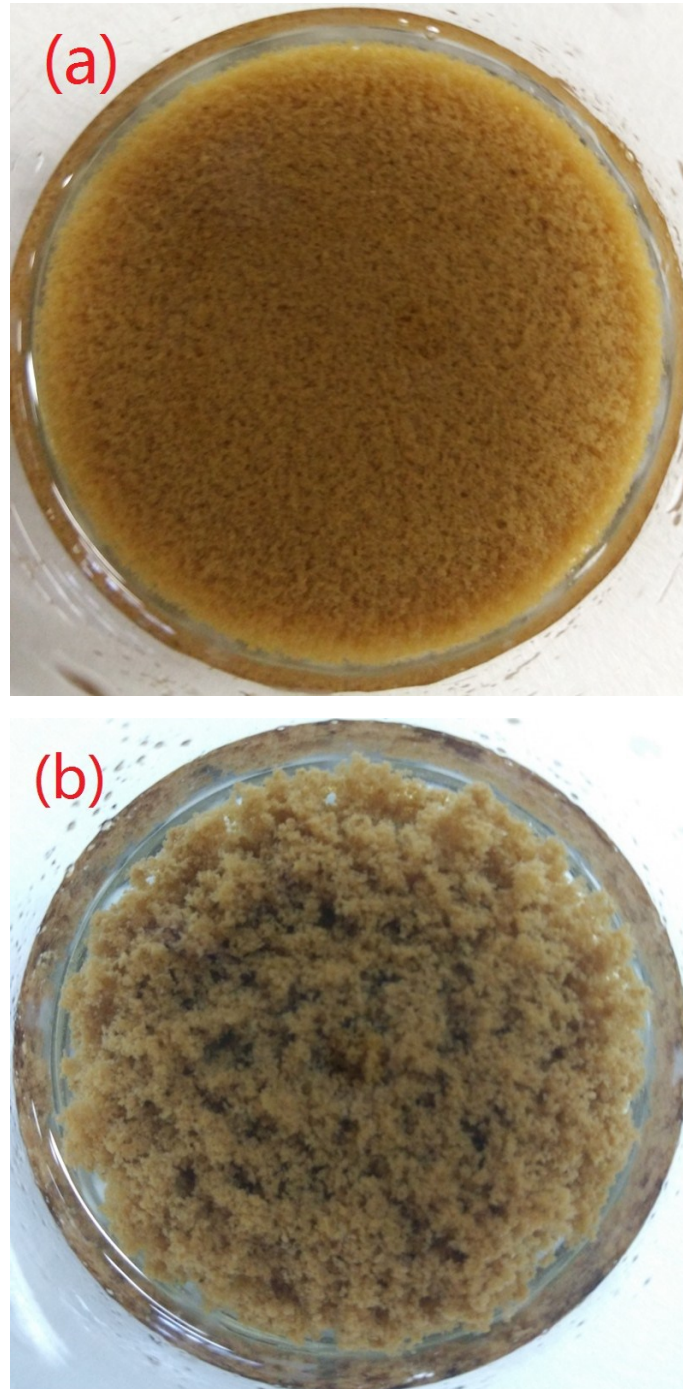

Fig. S 1. The morphology of the sludge conditioned by (a) CPAD and (b) TPAD-U

## References

- [1] H.Z. Shang, J.P. Liu, Y.B. Zheng, L.G. Wang, Synthesis, Characterization, and Flocculation Properties of Poly(acrylamide-methacryloxyethyltrimethyl Ammonium Chloride-Methacryloxypropyltrimethoxy Silane), *J. Appl. Polym. Sci*, 2009, **111**, 1594-1599.
- [2] D.F. Wang, T.Q. Zhao, L.Q. Yan, Z.M. Mi, Q. Gu and Y.M. Zhang, Synthesis, characterization and evaluation of dewatering properties of chitosan -grafting DMDAAC flocculants, *Int. J. Biol. Macromol*, 2016, **92**, 761-768.
- [3] H. Zhang, J.K. Yang, W.B. Yu, S. Luo, L. Peng, X.X. Shen, Y.F. Shi, S.N. Zhang, J. Song, N. Ye, Y. Li, C.Z. Yang, S. Liang, Mechanism of red mud combined with Fenton's reagent in sewage sludge conditioning. *Water Res*, 2014, **59**, 239-247.
